# Supplementary material for: Incorporating usability evaluation into iterative development of an online platform to support research participation in Parkinson’s disease: a mixed methods protocol
Source: PubMed Central journal article supplement (PMC10748888; doi:10.1136/bmjopen-2023-078638), 2023-12-19
Supplement: bmjopen-2023-078638supp001.pdf [file bmjopen-2023-078638supp001.pdf]

**People with Parkinson's and care partners) Interview Registration Form [to be inserted into JISC survey]**

**Section 1**

The following data is collected so that we are able to contact you to arrange an interview:

**First Name:**

**Surname:**

**Date of Birth:**

**Email Address:**

**Phone Number:**

**Have you been using the website as a person with Parkinson's or as a care partner?**

- Person with Parkinson's
- Care partner

**Preferred method of contact:**

- Email
- Phone

**Section 2**

We would like to ensure that the website is as user friendly as possible for everyone. By telling us a little bit more about yourself, you will help us achieve this goal.

**Post Code:**

**Gender**

**Please select your gender**

- Male
- Female
- Other (please specify)

**Ethnicity**

**Please select your ethnicity:**

- Asian/Asian British – Indian
- Asian/Asian British – Pakistani
- Asian/Asian British – Bangladeshi
- Asian/Asian British – Chinese
- Asian/Asian British – Any other Asian Background
- Black/African/Caribbean Background – African
- Black/African/Caribbean Background – Caribbean
- Black/African/Caribbean Background – Any other Black/African/Caribbean background
- Mixed Ethnic Group – White and Black Caribbean
- Mixed Ethnic Group – White and Black African

- Mixed Ethnic Group – White and Asian
- Mixed Ethnic Group – Any other mixed ethnic group
- Other Ethnic Group – Arab
- Other Ethnic Group – Berber Arab
- Other Ethnic Group – Ashkenazi Jewish
- White – English/Welsh/Scottish/Northern Irish/British
- White – Irish
- White – Gypsy or Irish Traveller
- White – Any other background

**Parkinson's disease diagnosis (not applicable for care partners)**

- When were you diagnosed with Parkinson's disease? (please give an approximate date if you are not sure) (dd/mm/yyyy)

**Familiarity with digital technology**

Please indicate if you are able to do any of the following tasks on a computer, phone or tablet

Managing information

- Use a search engine to look for information online
- Find a website I have visited before
- Download/save a photo I found online

Communicating

- Send a personal message via email or online messaging service
- Carefully make comments and share information online

Transacting

- Buy items or services from a website
- Buy and install apps on a device

Problem solving

- Verify sources of information I found online
- Solve a problem with a device/digital service using online help

Creating

- Complete online application forms which include personal details
- Create something new from existing online images, music or video
