# Supplementary material for: Incorporating usability evaluation into iterative development of an online platform to support research participation in Parkinson’s disease: a mixed methods protocol
Source: PubMed Central journal article supplement (PMC10748888; doi:10.1136/bmjopen-2023-078638), 2023-12-19
Supplement: bmjopen-2023-078638supp003.pdf [file bmjopen-2023-078638supp003.pdf]

## Prototype Topic Guide for Interviews with People with Parkinson's and Care Partners

Interviewer introduces themselves

Before we start, is it okay with you if I audio-record this session?

- The reason we record is so we can go back and remember what was said and what wasn't said. Destroyed as soon as study is done, any publications don't use names
  - *Ask again for confirmation once recording is on*
  - If no: "That's fine, is it okay if I type notes as we talk and share those notes with you once we have finished the interview so you can make sure they are accurate?"

The purpose of this study is find out about your experiences of using the website, so we can find out what is working well or what needs to be changed or improved. Your feedback is very valuable for us to evaluate the website.

Today we're going to be going through some questions to discuss your experiences using the website, and then you will have the opportunity to provide feedback on anything else you want to talk about that you feel we haven't covered. If there is anything you don't understand during the interview, feel free to ask!

Before we get into those questions, I just wanted to remind you that all of your answers will be kept confidential and stored on a password-protected computer that only the research team can access. The audio recording that we're taking today will be deleted as soon as it has been transcribed, and any identifying information (like your name) will be removed from the audio recording before it is transcribed.

So before we get started, do you have any questions?

### 1. General usability

- How would you describe your experience of using the website?
  - *How much did you like or dislike using the website? (Why was this? What made you like/dislike that aspect?)*
  - *How easy or difficult did you find the website to use? (Why was this? What made that aspect easy or difficult to use?)*
  - *What did you think of the colours used? (Why was this? What made you like/dislike the colours?)*

### 2. Registration and survey completion

- How did you find the process of registering for the website?
  - Do you feel there is anything that could be improved with the registration process?
  - If so, what?
- [PwP only] How did you find the demographic survey?
- [Carer only] How did you find the volunteer survey completion?
  - [Both] Were there any questions that you found difficult?

### 3. Finding studies

- Did you find it easy to find studies that you might be eligible for?
  - If no, why not?
  - If yes, what was your experience of this?
- What did you think of the study information provided?
  - Is there any other information about a study that you would want to know?
- Did you feel there was anything that could be improved when searching for studies?
  - If so, what?

### 4. Study enrolment and researcher contact

- Have you enrolled on to any studies through JPR?
  - If yes, what did you find easy about the process?
  - What did you find tricky?
  - Could anything have been clearer?
  - If no, why not?

### 5. General feedback

- What would you suggest to make the website better?
  - *Can you tell me more about that, and how you think it would improve the website?*
  - *Are there any other suggestion that you think would make the website better?*
- Is there anything else you would like to mention?
